# Supplementary material for: Lessons learned through piloting a community-based SMS referral system for common mental health disorders used by female community health volunteers in rural Nepal
Source: PubMed Central journal article supplement (PMC7328268; doi:10.1186/s13104-020-05148-5), 2020-07-01
Supplement: 13104_2020_5148_MOESM1_ESM.pdf [file 13104_2020_5148_MOESM1_ESM.pdf]

Step 1

- Send patient's name, mobile number, gender and age as an SMS to the server

Step 2

- Receive the patient's unique ID number as an SMS from the server

Step 3

- Send patient's unique ID number and provisional diagnosis as an SMS to the server

Step 4

- Receive confirmation of information received from server

Step 5

- Write down the patient's unique ID number and provisional diagnosis on paper referral slip to give to the patient
