# Supplementary material for: Lessons learned through piloting a community-based SMS referral system for common mental health disorders used by female community health volunteers in rural Nepal
Source: PubMed Central journal article supplement (PMC7328268; doi:10.1186/s13104-020-05148-5), 2020-07-01
Supplement: 13104_2020_5148_MOESM4_ESM.pdf [file 13104_2020_5148_MOESM4_ESM.pdf]

**Table S3a. Factors associated with correct and incorrect use of mCIDT for each diagnosis, categorical variables (n=34)**

|                               | Psychosis              |                      |         | Alcohol Use Disorder   |                      |         | Postpartum Depression  |                      |         | Epilepsy               |                      |         |
|-------------------------------|------------------------|----------------------|---------|------------------------|----------------------|---------|------------------------|----------------------|---------|------------------------|----------------------|---------|
|                               | Incorrect mCIDT, n (%) | Correct mCIDT, n (%) | p-value | Incorrect mCIDT, n (%) | Correct mCIDT, n (%) | p-value | Incorrect mCIDT, n (%) | Correct mCIDT, n (%) | p-value | Incorrect mCIDT, n (%) | Correct mCIDT, n (%) | p-value |
| <b>Education</b>              |                        |                      | .000    |                        |                      | .000    |                        |                      | .000    |                        |                      | .000    |
| Illiterate                    | 1(0)                   | 3(100)               |         | 1(25)                  | 3(75)                |         | 2(50)                  | 2(50)                |         | 1(25)                  | 3(75)                |         |
| Literate                      | 17(89.5)               | 2(10.5)              |         | 17(89)                 | 2(10)                |         | 17(89)                 | 2(11)                |         | 16(84.2)               | 3(15.3)              |         |
| Grade 1-5                     | 2(66.7)                | 1(33.3)              |         | 0(0)                   | 3(100)               |         | 1(33.3)                | 2(66.7)              |         | 0(0)                   | 3(100)               |         |
| Grade 5-10                    | 0(0)                   | 3(100)               |         | 0(0)                   | 3(100)               |         | 1(33.3)                | 2(66.7)              |         | 0(0)                   | 3(100)               |         |
| SLC pass & above              | 0(0)                   | 5(100)               |         | 0(0)                   | 5(100)               |         | 0(0)                   | 5(100)               |         | 0(0)                   | 5(100)               |         |
| <b>Ward</b>                   |                        |                      | .267    |                        |                      | .368    |                        |                      | .184    |                        |                      | .168    |
| Ratanchura (1)                | 4(44.4)                | 5(55.6)              |         | 4(44.4)                | 5(55.6)              |         | 4(44.4)                | 5(55.6)              |         | 2(22.2)                | 7(77.8)              |         |
| Bhimeshwor (2)                | 4(44.4)                | 5(55.6)              |         | 3(33)                  | 6(66)                |         | 4(44.4)                | 5(55.6)              |         | 4(44.4)                | 5(55.6)              |         |
| Bhuwaneshwori (3)             | 7(87.5)                | 1(12.5)              |         | 6(75)                  | 2(25)                |         | 6(75)                  | 2(25)                |         | 5(62.5)                | 3(37.5)              |         |
| Basehwor (4)                  | 5(62.5)                | 3(37.5)              |         | 5(62.5)                | 3(37.5)              |         | 7(87.5)                | 1(12.5)              |         | 6(75)                  | 2(25)                |         |
| <b>Can send a SMS</b>         |                        |                      | .017    |                        |                      | .003    |                        |                      | .039    |                        |                      | .015    |
| No                            | 13(81.2)               | 3(18.7)              |         | 13(81)                 | 3(19)                |         | 13(81)                 | 3(19)                |         | 12(75)                 | 4(25)                |         |
| Yes                           | 7(38)                  | 11(62)               |         | 5(27)                  | 13(73)               |         | 8(44.4)                | 10(55.6)             |         | 5(27.8)                | 13(72.2)             |         |
| <b>Can use mCIDT Codebook</b> |                        |                      | .004    |                        |                      | .000    |                        |                      | .012    |                        |                      | .084    |
| No                            | 15(83.3)               | 3(16.7)              |         | 15(83)                 | 3(17)                |         | 15(83)                 | 3(17)                |         | 12(66.7)               | 6(33.3)              |         |
| Yes                           | 5(31.3)                | 11(68.7)             |         | 3(18.8)                | 13(81.3)             |         | 6(37.5)                | 10(62.5)             |         | 5(31.3)                | 11(68.8)             |         |

Two-tailed Fisher's exact test t-test compares correctly or incorrectly completing mCIDT step 1 message completion among persons who accurately identified paper CIDT.

**Table S3b. Factors associated with correct and incorrect use of mCIDT for each diagnosis, continuous variables (n=34)**

|                    | Psychosis                     |                             |                           |         | Alcohol Use Disorder          |                             |                           |         | Postpartum Depression         |                             |                           |         | Epilepsy                      |                             |                           |         |
|--------------------|-------------------------------|-----------------------------|---------------------------|---------|-------------------------------|-----------------------------|---------------------------|---------|-------------------------------|-----------------------------|---------------------------|---------|-------------------------------|-----------------------------|---------------------------|---------|
|                    | Incorrect mCIDT, Median (IQR) | Correct mCIDT, Median (IQR) | Test statistic (Wilcoxon) | p-value | Incorrect mCIDT, Median (IQR) | Correct mCIDT, Median (IQR) | Test statistic (Wilcoxon) | p-value | Incorrect mCIDT, Median (IQR) | Correct mCIDT, Median (IQR) | Test statistic (Wilcoxon) | p-value | Incorrect mCIDT, Median (IQR) | Correct mCIDT, Median (IQR) | Test statistic (Wilcoxon) | p-value |
| <b>Age (years)</b> | 57 (48, 60)                   | 40 (35, 51.25)              | 17.50                     | .009    | 52.5 (47.25, 59.5)            | 42 (35, 48.75)              | 40.00                     | .001    | 51.5 (44.8, 60)               | 45 (36, 48.5)               | 57.00                     | .016    | 53 (46.5, 60.5)               | 45 (36, 52)                 | 67.00                     | .08     |
